# Supplementary material for: Sex-Specific Cardiac Troponin Thresholds in Transgender Patients With Suspected Acute Coronary Syndrome
Source: PubMed Central journal article supplement (PMC10570872; doi:10.1001/jamanetworkopen.2023.37345), 2023-10-12
Supplement: jamanetwopen-e2337345-s001.pdf [file jamanetwopen-e2337345-s001.pdf]

## Data Sharing Statement

Wang. Sex-Specific Cardiac Troponin Thresholds in Transgender Patients With Suspected Acute Coronary Syndrome. *JAMA Netw Open*. Published October 12, 2023.  
doi:10.1001/jamanetworkopen.2023.37345

### Data

**Data available:** No
